# Supplementary material for: Self-assembly of Cu-glutathione nanoparticles/CdS nanosheets for boosting photoredox performance under visible-light irradiation
Source: Research Square preprint supplement (doi:10.21203/rs.3.rs-8092460/v1), 2025-12-15
Supplement: Supplementary file 1 [file 4b2e86d5b66ff03e20d2c673.docx]

**Self-assembly of Cu-glutathione nanoparticles/CdS nanosheets for boosting photoredox performance under visible-light irradiation**

Zhi-yu Lianga, Gui-yang Yana, Er-da Zhanb, Ji-tao Huanga*, Guo-xin Zhuangc, Ying Wanga*

a Fujian Provincial Key Laboratory of Featured Materials in Biochemical Industry, College of New Energy and Materials, Ningde Normal University, Fujian 352100, China

b College of Chemistry, Fuzhou University, 2 Xueyuan Road, University New District, Fuzhou 350108, China.

c Scientific Research and Experiment Center, Fujian Police College, No. 59 Shoushan Road, Fuzhou, 350007, Fujian, China

*Corresponding author. E-mail: huangjitao818@126.com

1210058102@qq.com


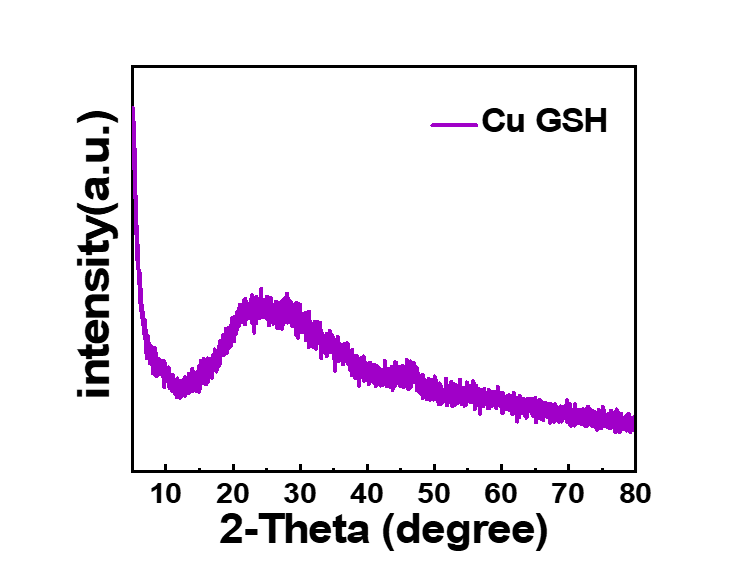


**Figure s1.** The XRD pattern of Cu GSH.


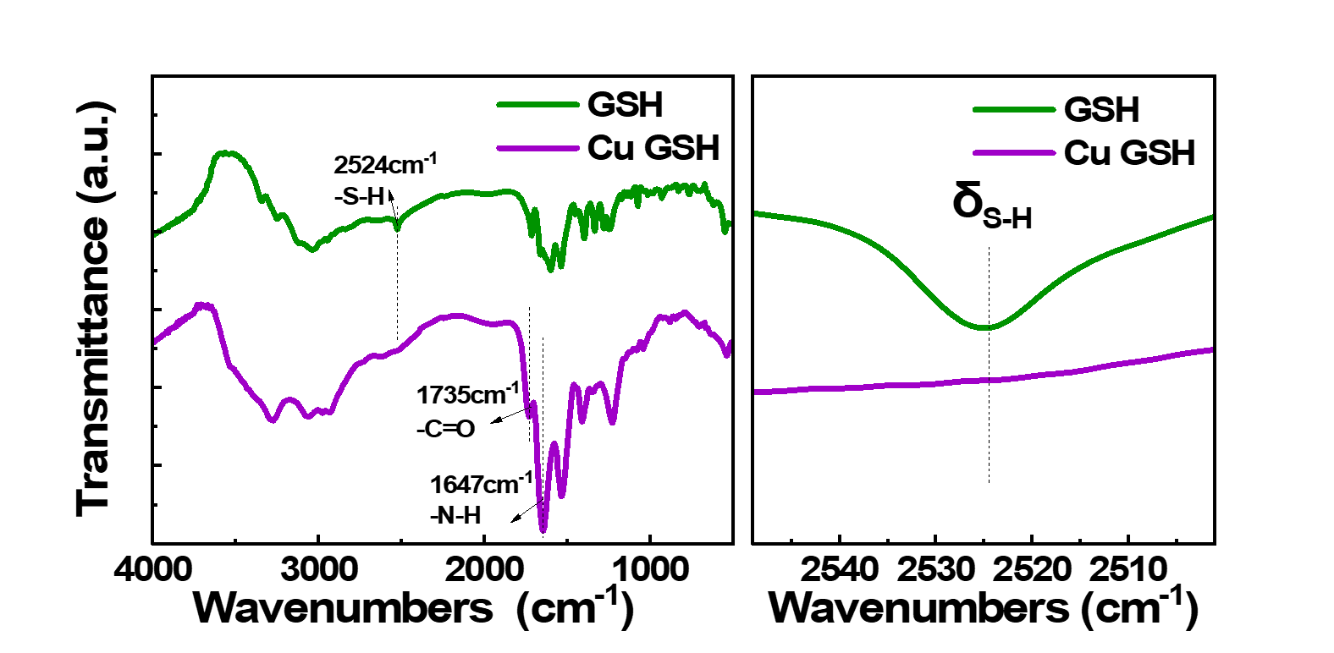


**Figure s2.** The FT-IR spectrum of Cu GSH and GSH, partial enlarged drawing of FT-IR spectrum to observe the S-H stretching vibration mode.

The absorption peak observed at 2524 cm-1 in GSH was attributed to the S-H stretching vibration mode, while this vibration mode was found to be absent in the infrared spectrum of Cu GSH, suggesting that the S-H bond had been broken after binding with Cu. This also verifies that Cu GSH is stabilized by forming Cu-S bonds [1]. Additionally, the absorption peak at 1647 cm-1 was attributed to the bending vibration of the N-H bond in the amino group, and the absorption peak at 1735 cm-1 was attributed to the stretching vibration of the C=O bond in the carboxyl group.


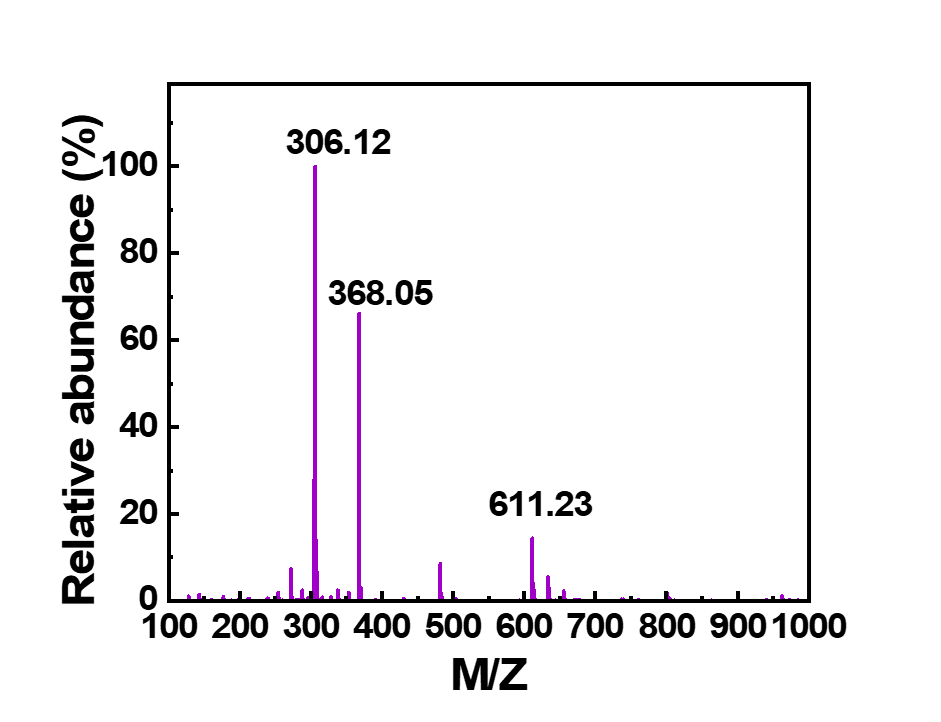


**Figure s3.** ESI-Q-TOF MS of Cu GSH.

Strong signal intensities were observed at m/z of 306.12 and 611.23, which are very close to the relative molecular weights of GSH (307) and GSSG (612). It is suggested that during the high-energy ionization process, a certain amount of GSH detaches from Cu GSH, with some existing as monomeric GSH and others as the oxidized form GSSG (Oxidized glutathione, C20H32N6O12S2) [2]. Among these, the m/z at 368.05 corresponds to a complex composed of one Cu atom and one GSH molecule, indicating that Cu GSH is primarily composed of a 1:1 complex.


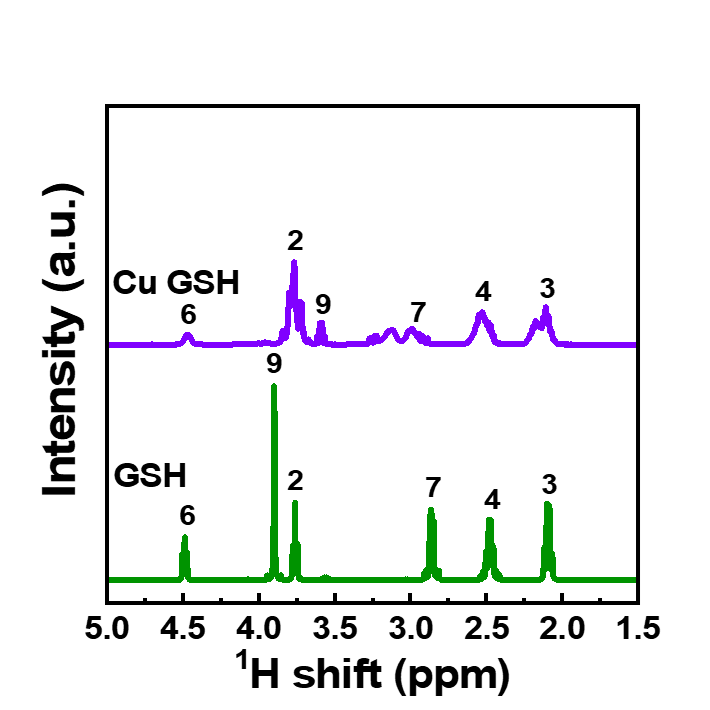


**Figure s4.** The 1H-NMR spectra of GSH and Cu GSH.

Signals at 2.12 and 2.51 ppm can be assigned to the hydrogen at position 3 and position 4 of GSH, respectively, based on its chemical structure. Additionally, the peak of the hydrogen at position 7 is split into two peaks at 3.25 and 2.91 ppm, likely due to the adjacent chiral hydrogen at position 6 [3]. The corresponding proton signals are significantly shifted downfield because the hydrogens at positions 6 and 7 are very close to the copper core. Based on the above analysis, the structure of Cu GSH can be concluded, the Cu GSH is primarily composed of a 1:1 complex and stabilized by forming Cu-S bonds.


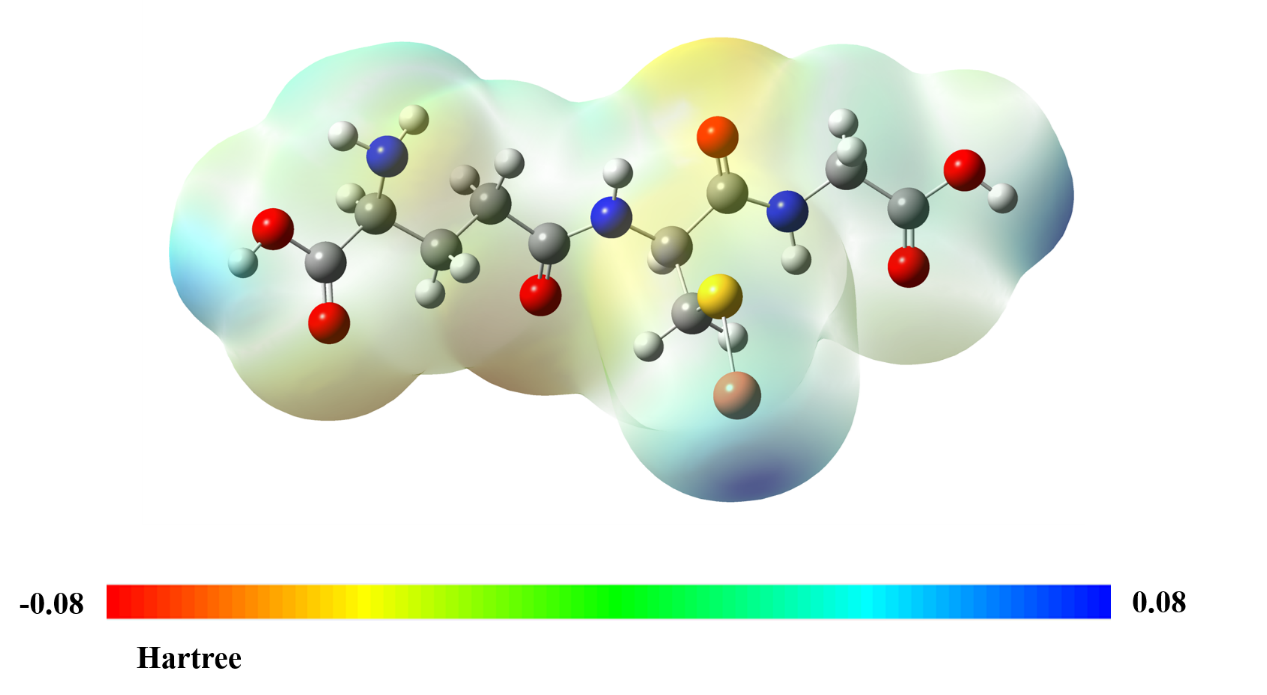


**Figure s5.** The structure diagram of Cu GSH.

**References**

[1] R. M. Sun, R. J. Lv, Y. Zhang, T. Du, Y. H. Li, L. X. Chen, Y. F. Qi, Colorimetric sensing of glucose and GSH using core-shell Cu/Au nanoparticles with peroxidase mimicking activity, *Rsc Adv.*, 12 (2022) 21875-21884.

[2] L. Zhang, Y. Wan, Y. Wu, J. Wang, D. Xu, W. Duan, D. Chen, D. Liu, GSH capped Cu-Zn-In-S quantum dots: one-pot aqueous synthesis and cell labeling applications, *Chalcogenide Lett.*, 18 (2021) 505-512.

[3] J. H. Zhang, Z. T. Zhang, Y. J. Ou, F. Zhang, J. Meng, G. Wang, Z. L. Fang, Y. Li, Red-emitting GSH-Cu NCs as a triplet induced quenched fluorescent probe for fast detection of thiol pollutants, *Nanoscale*, 12 (2020) 19429-19437.
